# Supplementary material
Source: Springer Nature journal article supplement (https://www.springermedizin.de/resource/supplementary/12876_2011_777_MOESM5_ESM.pdf/9437764)

**Untreated**

**Differentiated**

**A**

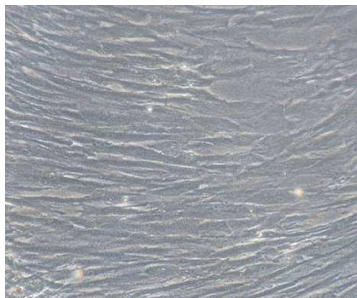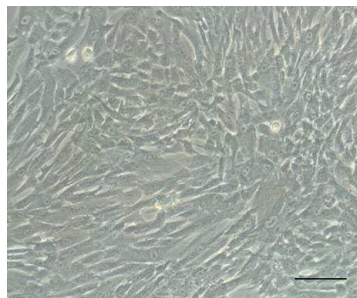

**Untreated**

**Differentiated**

**B**

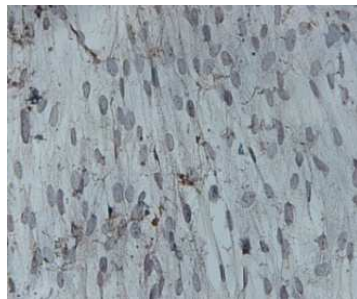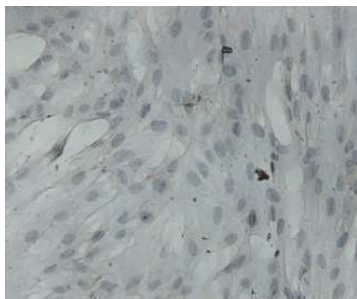

**AFP**

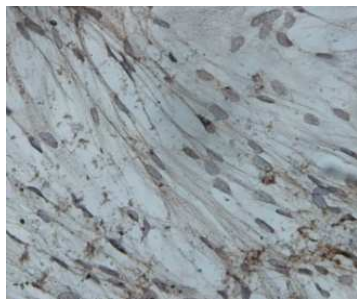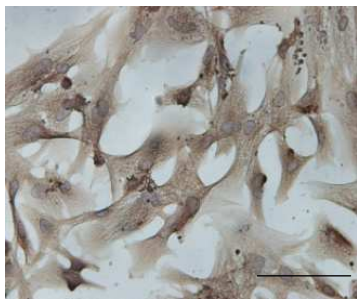

**Albumin**

**Untreated**

**Differentiated**

**C**

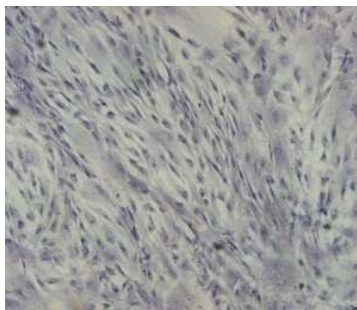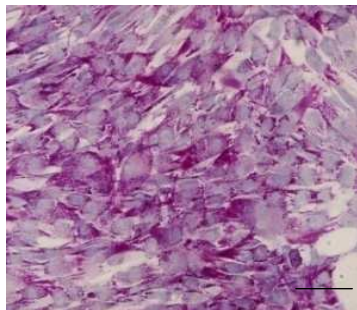

Supplement: MOESM5 [file 9437764]
